# Supplementary material for: Tuning the electrical properties of the heart by differential trafficking of KATP ion channel complexes
Source: PubMed Central journal article supplement (PMC4004980; doi:10.1242/jcs.141440), 2014-05-01
Supplement: supp_127.9.2106_JCS141440.pdf [file supp_127.9.2106_JCS141440.pdf]

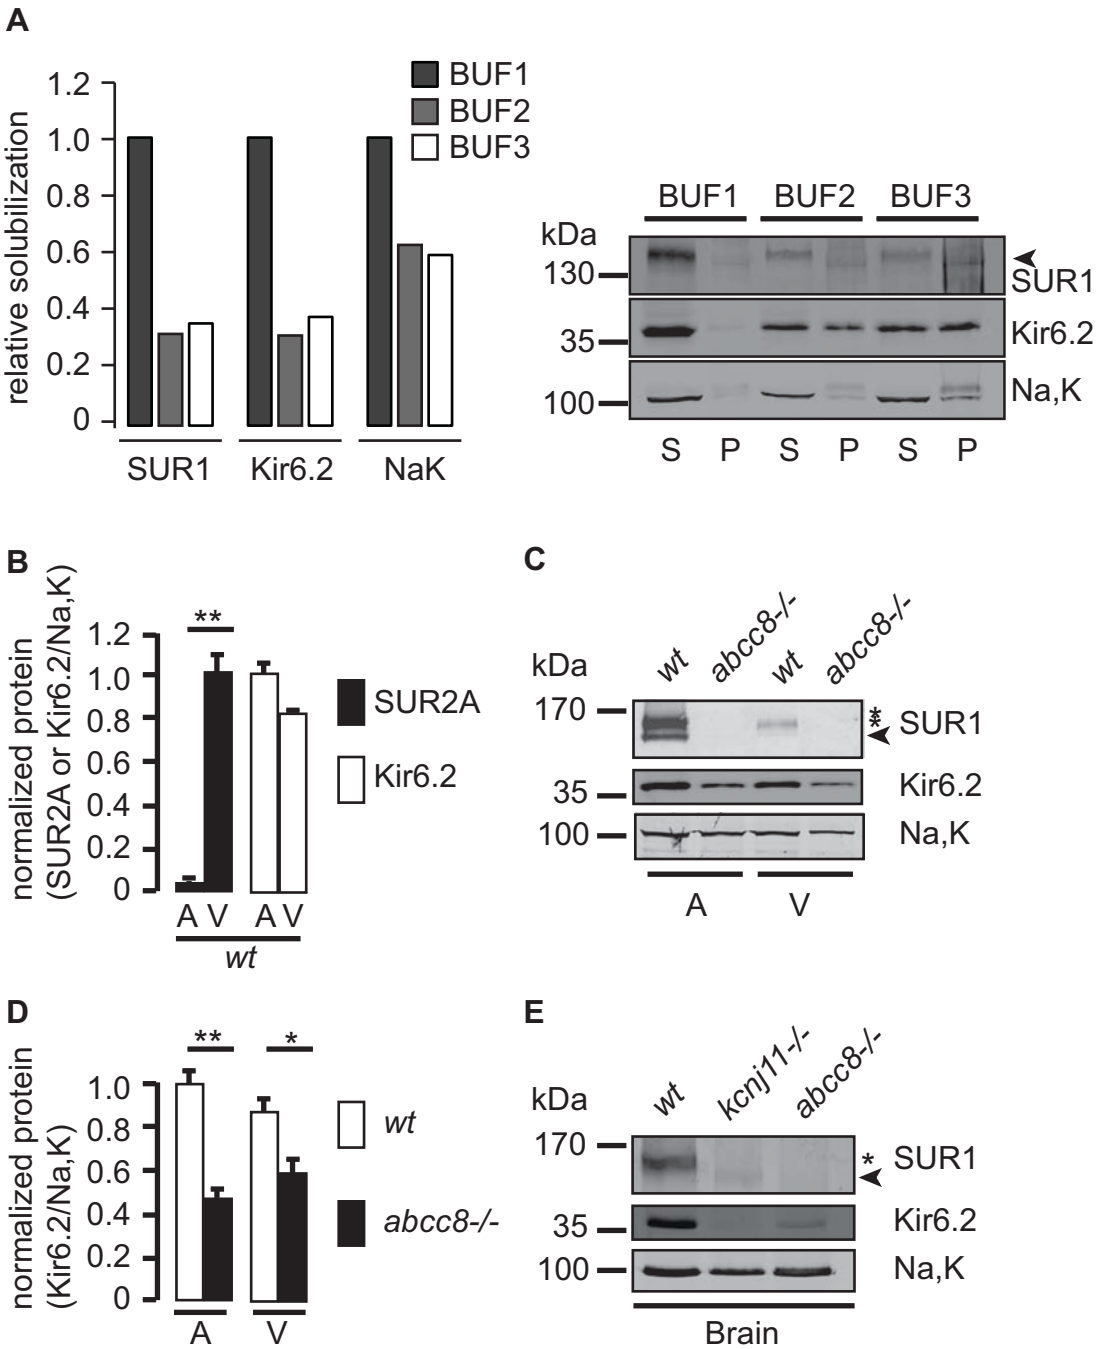

A

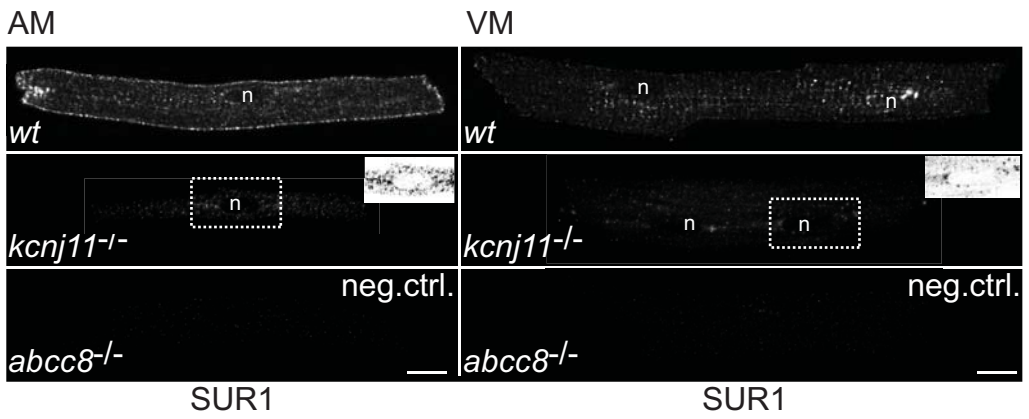

B

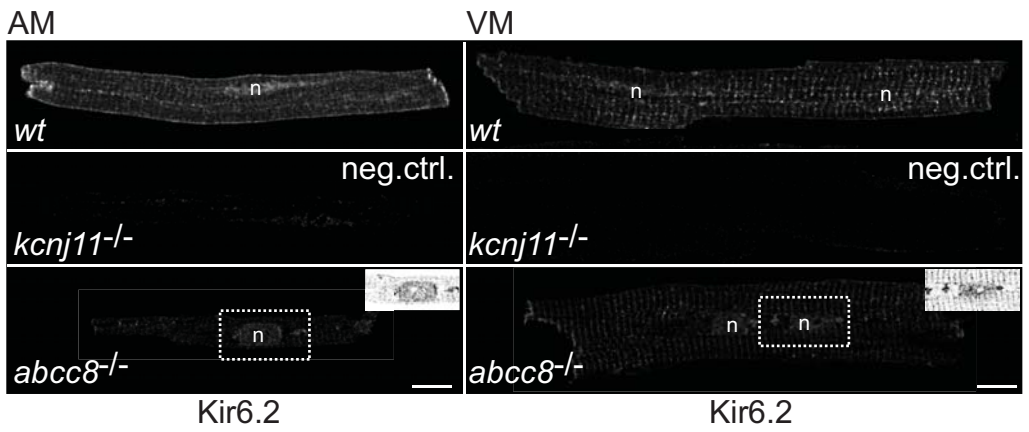

C

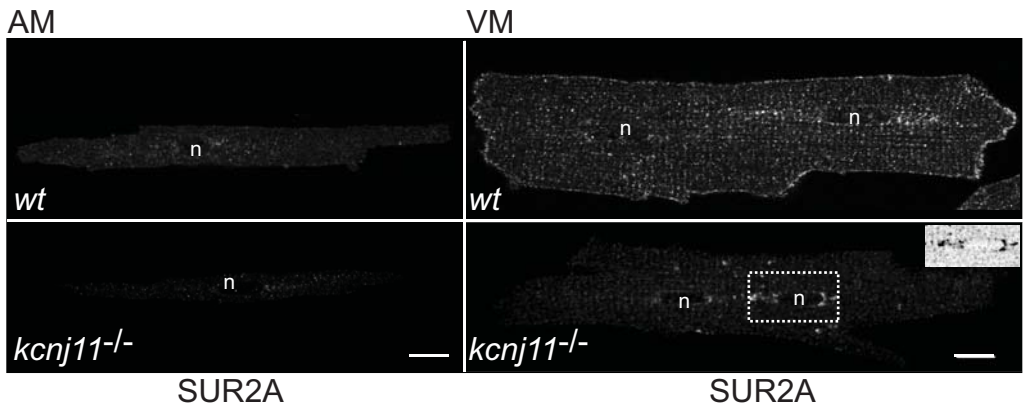

D

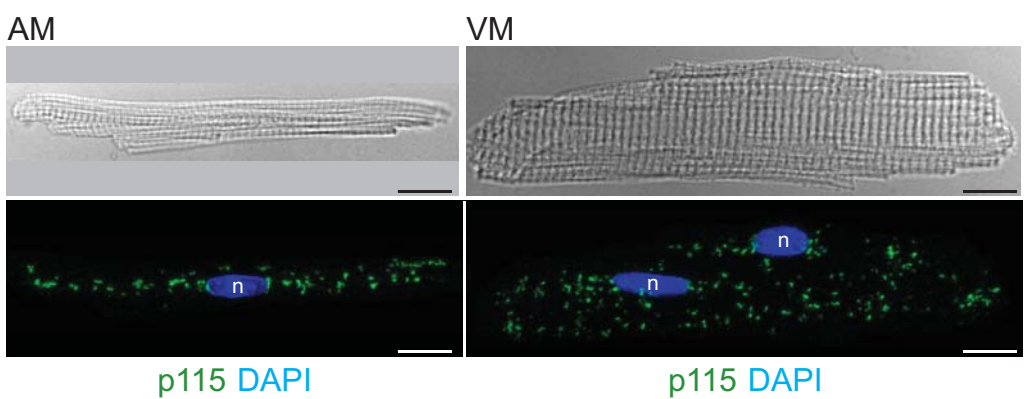

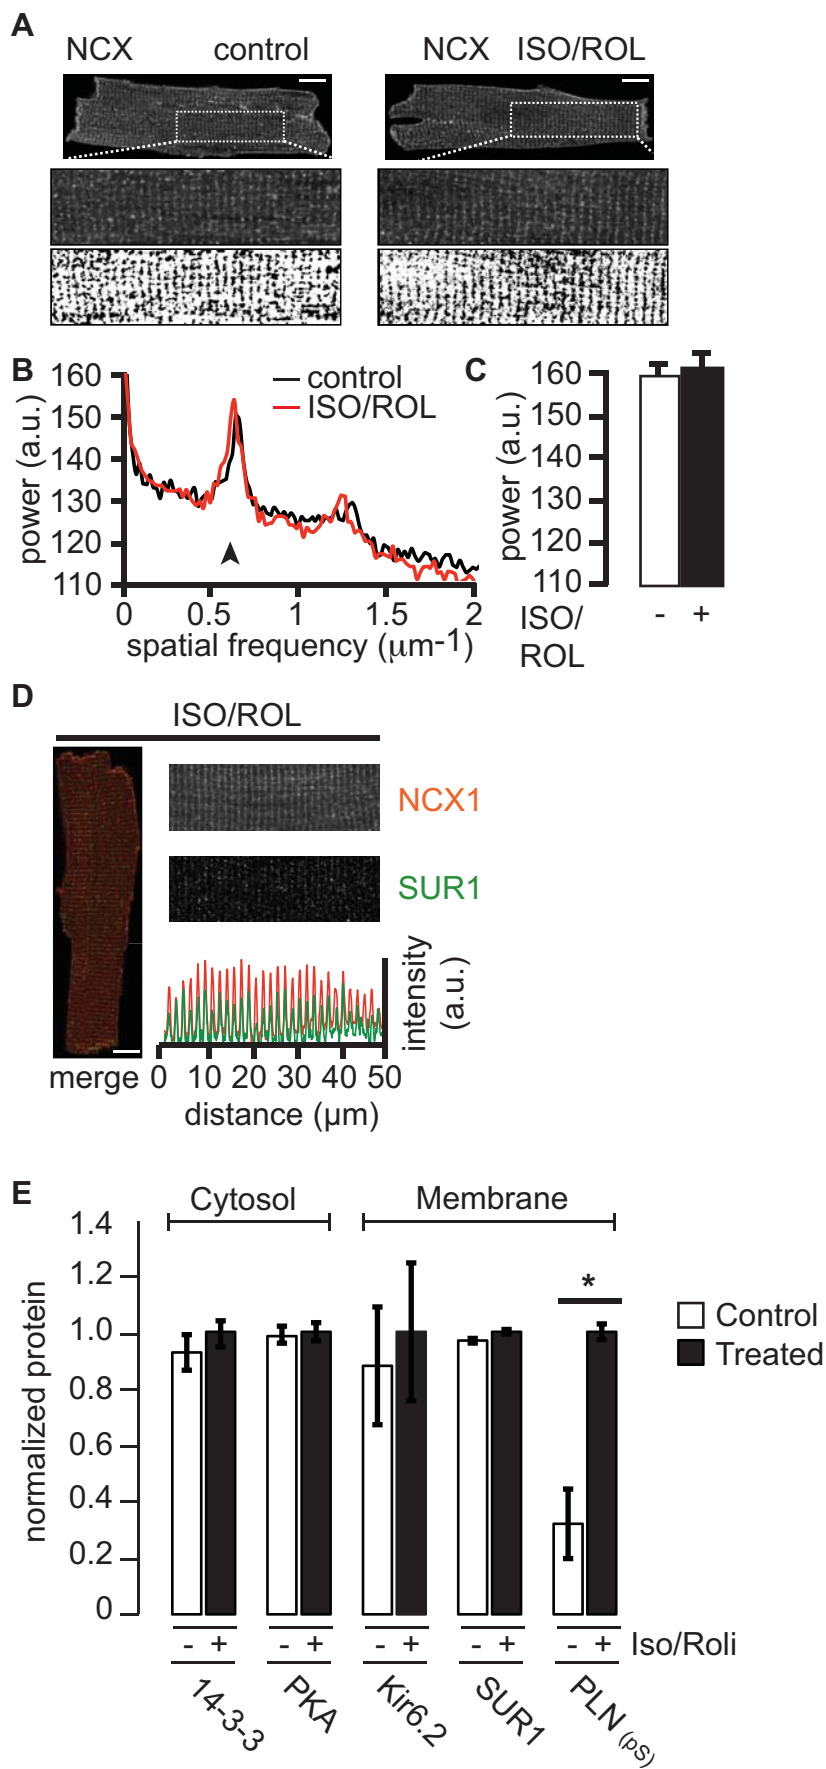

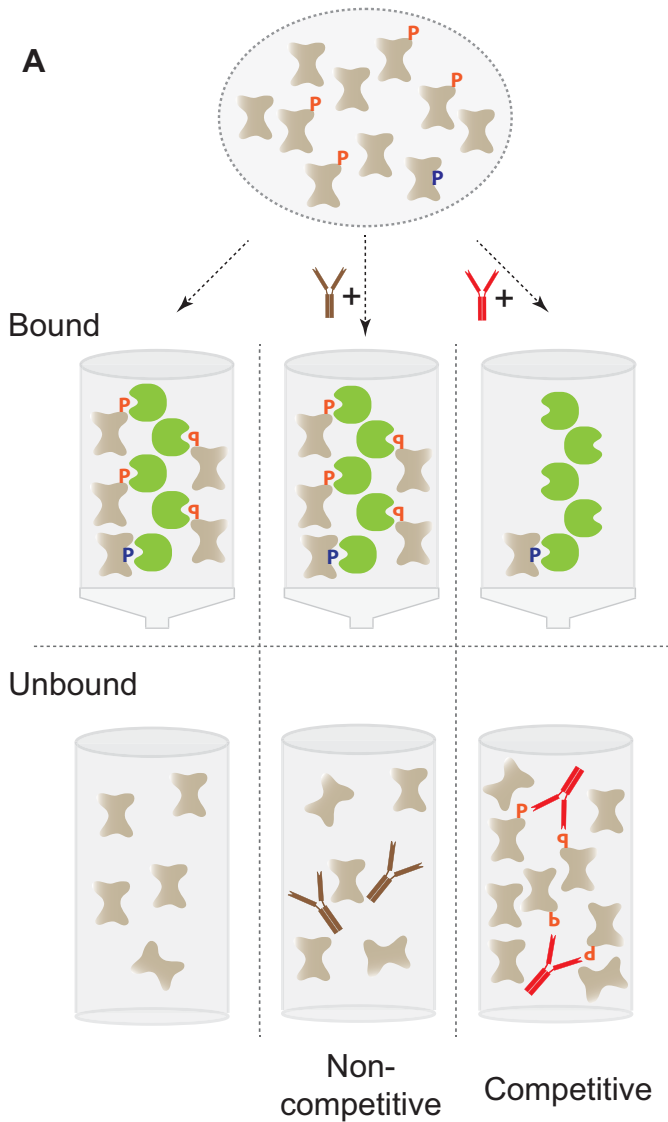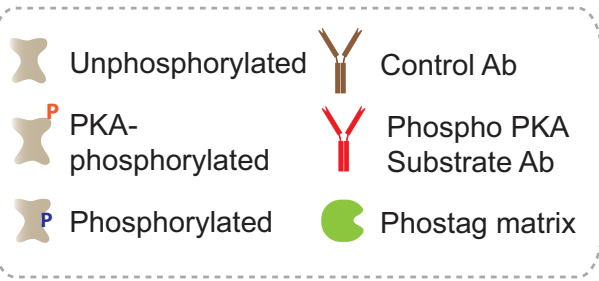

Kir6.2 CT LLDALTLASSRGPL**RRKRS**SVAVAKAKPKFISPDLSL

PKA pSub Ab Epitope (K/R) (K/R) X (pS/pT)

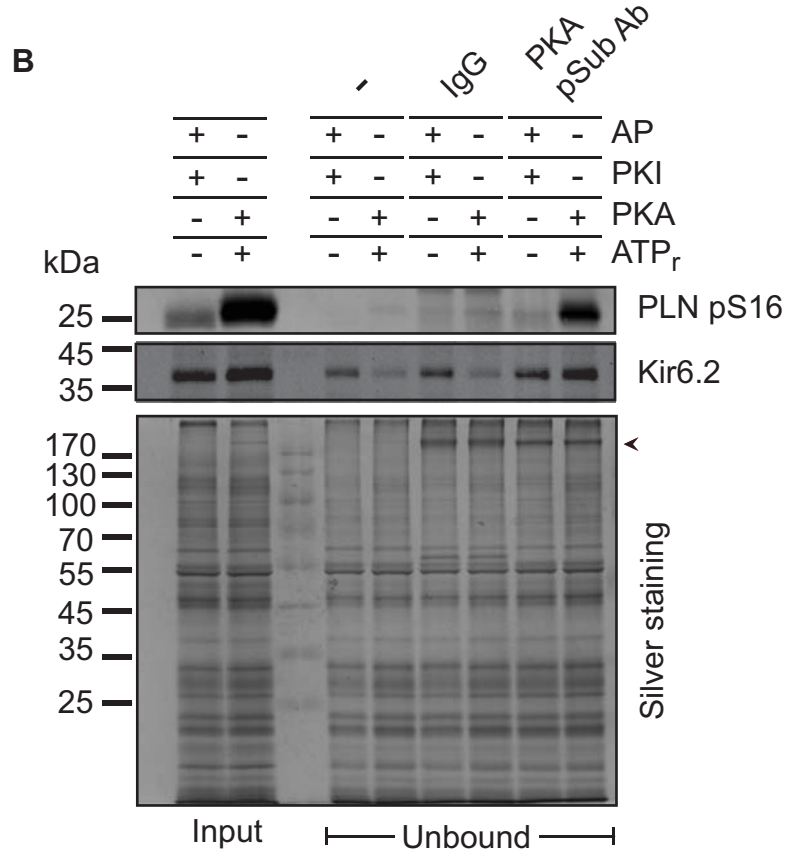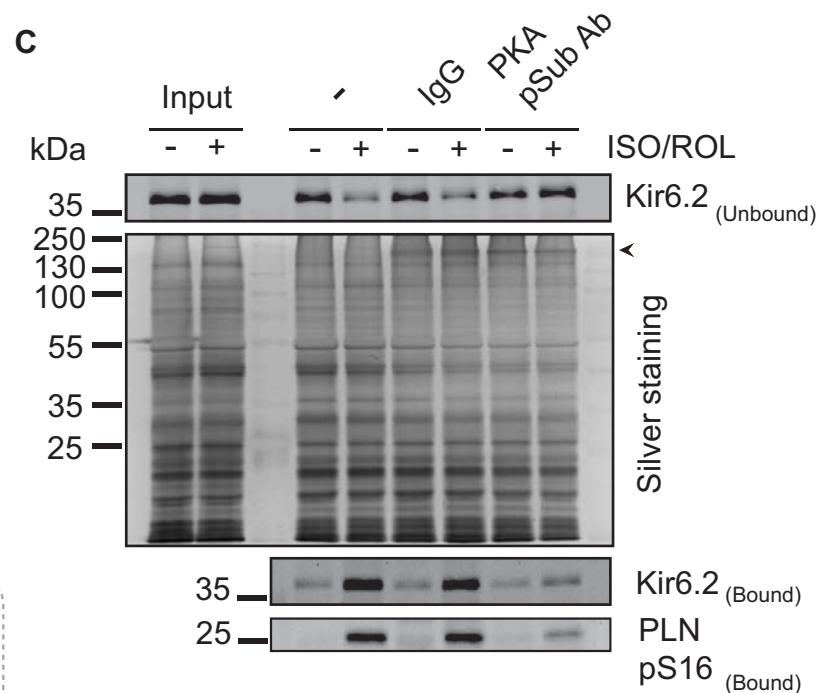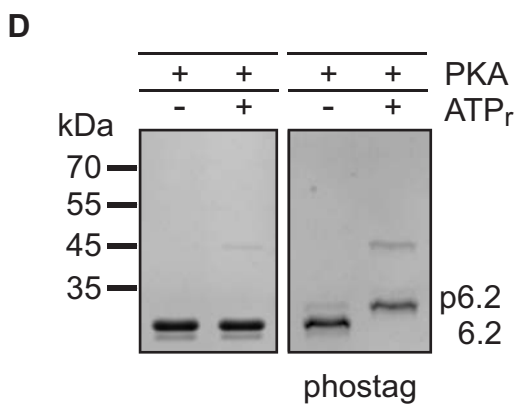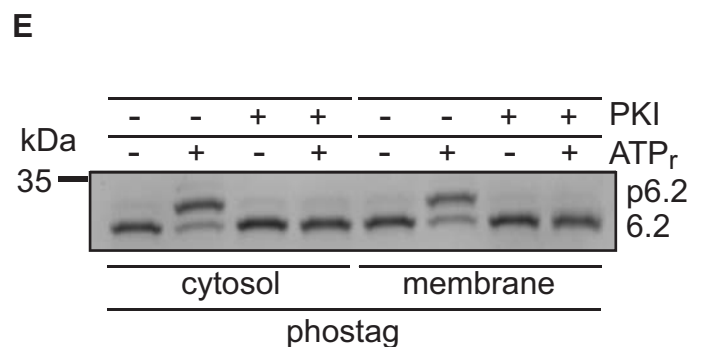

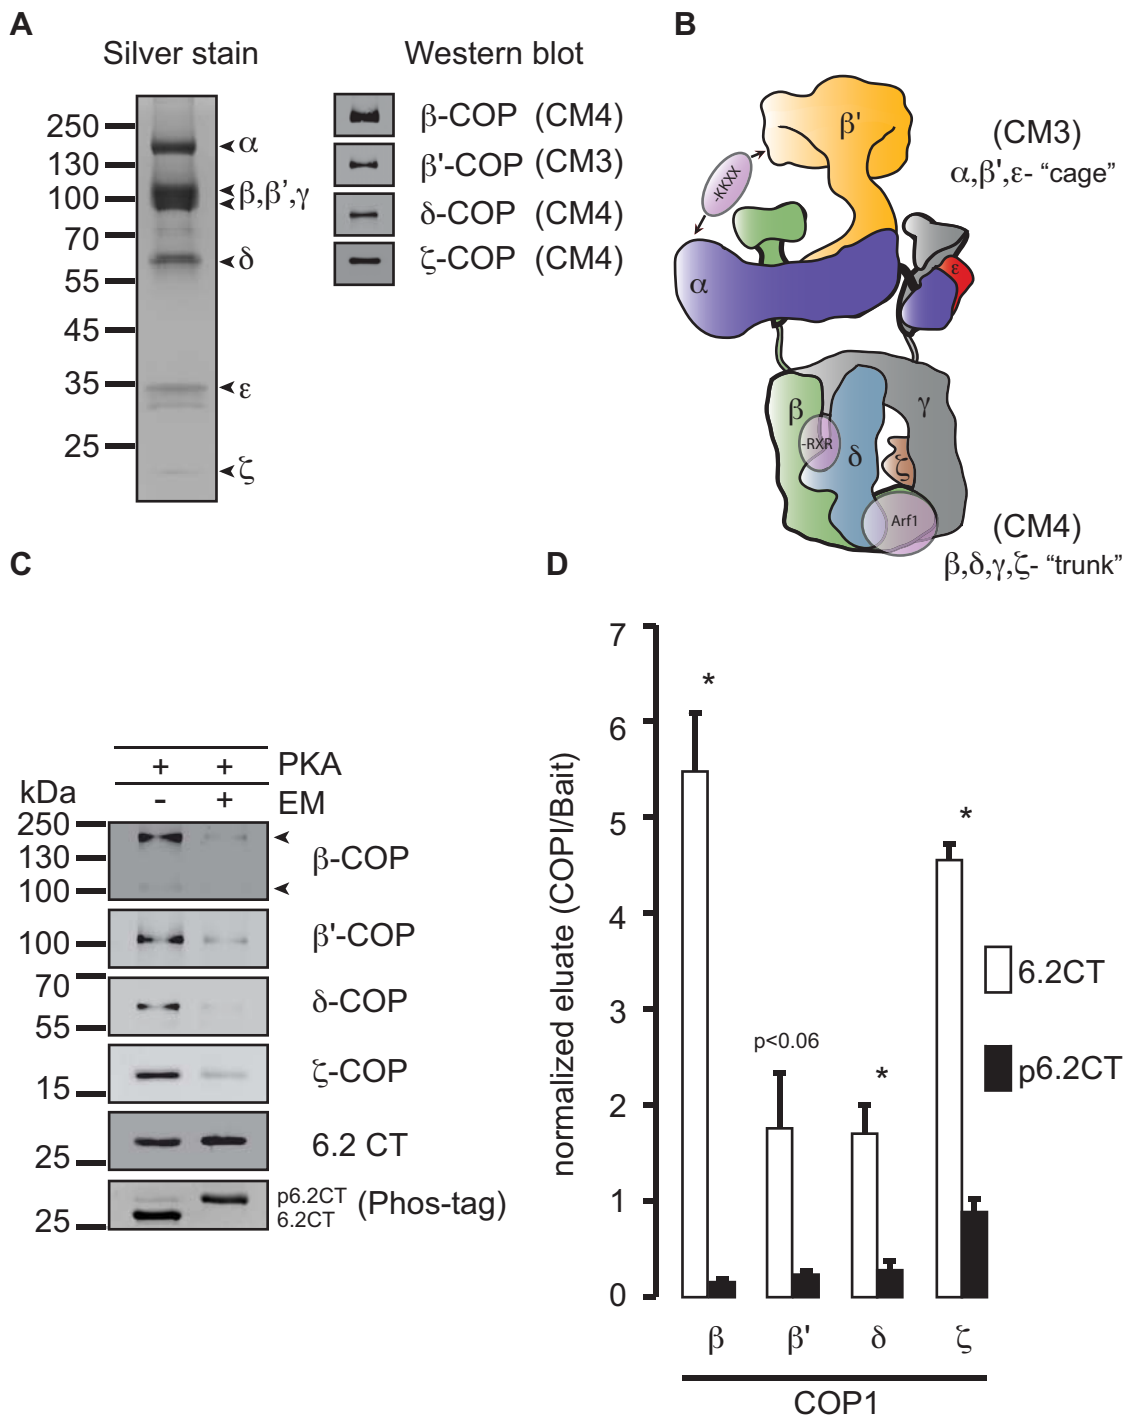

**Table-S1 Antibody List**

|    | <b>Antigen</b>             |    | <b>Clone/<br/>Name</b> | <b>Spec.</b>  | <b>Source</b>                     | <b>Cat. No.</b>   | <b>Lot No.</b>                | <b>Conc.</b>            | <b>Dil.<br/>(WB)</b> | <b>Dil.<br/>(IF)</b> | <b>Dil.<br/>(EM)</b> |
|----|----------------------------|----|------------------------|---------------|-----------------------------------|-------------------|-------------------------------|-------------------------|----------------------|----------------------|----------------------|
| 1  | 14-3-3                     | a) | H-8                    | Mouse         | Santa Cruz<br>Biotechnology, inc. | SC-1657           | #E1011                        | 200 µg/ml               | 1:1000               |                      | 1:20                 |
|    |                            | b) | K-19                   | Rabbit        | Santa Cruz<br>Biotechnology, inc. | SC-629            | #D1406, #I1411,<br>#B2712     | 200 µg/ml               | 1:1000               | 1:500                |                      |
|    |                            | c) | T-16                   | Rabbit        | Santa Cruz<br>Biotechnology, inc. | SC-1020           | #I1008                        | 200 µg/ml               | 1:1000               |                      |                      |
| 2  | Kir6.2                     |    | #3                     | Guinea<br>Pig | Self-made                         | -                 | -                             | Serum                   | 1:1000               | 1:500                |                      |
| 3  | Na+K+ATPase                |    | C464.6                 | Mouse         | Santa Cruz<br>Biotechnology, inc. | SC-21712          | #G3004                        | 200 µg/ml               | 1:1000               |                      |                      |
| 4  | SUR1                       |    | N289/16                | Mouse         | Neuromab                          | 75-267            | #4492AK44                     | 1.03 mg/ml              | 1:500                |                      |                      |
|    |                            |    |                        |               |                                   | 73-267            | #4375VA10                     | 26.9 µg/ml              | 1:25                 | 1:10                 |                      |
| 5  | SUR2A                      |    | N319A/<br>14           | Mouse         | Neuromab                          | 75-296            | #4493AK38                     | 1.01 mg/ml              | 1:200                |                      |                      |
|    |                            |    |                        |               |                                   | 73-296            | #4376VA13                     | 22 µg/ml                | 1:15                 | 1:5                  |                      |
| 6  | NCX1                       |    | -                      | Rabbit        | Swant                             | 11-13             | #28                           | *                       | 1:1000               | 1:500                |                      |
| 7  | Nav1.5                     |    | -                      | Rabbit        | Alomone Labs                      | ASC-005           | AN2502                        | 0.8 mg/ml               | 1:1000               |                      |                      |
| 8  | β1- Adrenergic<br>receptor |    | V-19                   | Rabbit        | Santa Cruz<br>Biotechnology, inc. | SC-568            | #C0111                        | 200 µg/ml               | 1:1000               |                      |                      |
| 9  | β- Dystroglycan            |    | 4F7                    | Mouse         | Santa Cruz<br>Biotechnology, inc. | SC-33702          | #J0808                        | 200 µg/ml               | 1:1000               |                      |                      |
| 10 | p115                       |    | -                      | Mouse         | BD Transduction<br>Laboratories   | 611434/<br>612260 | #73424/<br>#28136             | 250 µg/ml               |                      | 1:500                | 1:80                 |
| 11 | GAPDH                      |    | -                      | Mouse         | Biotrend Chemikalien<br>GmbH      | 5G4-6C5           | #11/06-G4-C5/<br>#08/07-G4-C5 | 5.3 mg/ml<br>12.8 mg/ml | 1:40000              |                      |                      |
| 12 | Protein- C (Epitope)       |    | HPC4                   | Mouse         | Roche                             | 11814508001       | -                             |                         | 1:2500               |                      |                      |
| 13 | β-COP (Beta)               |    | B:1.2                  | Rabbit        | Felix Wieland                     | -                 | -                             | Serum                   | 1:2000               |                      |                      |
|    |                            |    | M3A5                   | Mouse         | Sigma                             | G-2279            | G-2279                        | Ascite Sup.             | 1:500                |                      |                      |
| 14 | β'-COP (Beta-Prime)        |    | CIPL                   | Rabbit        | Felix Wieland                     | -                 | -                             | Serum                   | 1:3000               |                      |                      |

|    |                          |        |        |                              |          |          |         |        |  |  |
|----|--------------------------|--------|--------|------------------------------|----------|----------|---------|--------|--|--|
| 15 | $\delta$ -COP (Zeta)     | #877   | Rabbit | Felix Wieland                | -        | -        | Serum   | 1:1000 |  |  |
| 16 | $\zeta$ 1-COP (Delta)    | -      | Rabbit | Felix Wieland                | -        | -        | Serum   | 1:3000 |  |  |
| 17 | $\zeta$ 2-COP (Delta)    | -      | Rabbit | Felix Wieland                | -        | -        | Serum   | 1:2500 |  |  |
| 18 | pSer16<br>Phospholamban  | -      | Rabbit | Badrilla Ltd.                | A-010-12 | #1010-01 | *       | 1:5000 |  |  |
| 19 | Phospholamban            | 2D12   | Mouse  | Abcam                        | ab2865   |          |         | 1:2500 |  |  |
| 20 | Rabbit Normal IgG        |        | Rabbit | Cell Signaling<br>Technology | #2729    | 6        | 1 mg/ml |        |  |  |
| 21 | Phospho-PKA<br>substrate | 100G7E | Rabbit | Cell Signaling<br>Technology | #9624    | 16       |         |        |  |  |

\* Reconstituted as recommended

| Protein              | Alignment                                                                                                                        | Topology | Characterisation                                                                                                                   | Reference                                                                                                                                                                                                                                                                                       |
|----------------------|----------------------------------------------------------------------------------------------------------------------------------|----------|------------------------------------------------------------------------------------------------------------------------------------|-------------------------------------------------------------------------------------------------------------------------------------------------------------------------------------------------------------------------------------------------------------------------------------------------|
| CD74 (II p35)        | H.s. <b>MHRRKRS</b> KREDEO                                                                                                       |          | 14-3-3 binding site<br>Ser-6 and Ser-8 phosphorylated<br>Cell surface expression upon mutation of Arg-based signal                 | Kuwana T et al., Proc Natl Acad Sci U S A. 1998 Feb 3;95(3):1056-61<br>Khalil H et al., Int Immunol. 2003 Oct;15(10):1249-63<br>Khalil H et al., J Cell Sci. 2005 Oct 15;118(Pt 20):4679-87                                                                                                     |
| ADAM22               | H.s. <b>NGRFPFNS</b> ... <b>KFRFPFNS</b><br>M.m. <b>NGRFPFNS</b> ... <b>KFRFPFNS</b><br>B.t. <b>NGRFPFNS</b> ... <b>KFRFPFNS</b> |          | 14-3-3 binding site<br>Cell surface expression upon mutation of Arg-based signal                                                   | Godde NJ et al., J Cell Sci., 2006 Aug 15;119 (Pt 16):3296-305.                                                                                                                                                                                                                                 |
| TMX4                 | H.s. <b>VEDSLRQRK</b> SHAD<br>M.m. <b>VEDALRQRK</b> SHAN<br>B.t. <b>LDQSLRQRK</b> SHAD                                           |          | Cell surface expression upon mutation of Arg-based signal                                                                          | Roth D et al., Biochem J., 2009 Dec 14;425(1):195-205                                                                                                                                                                                                                                           |
| PLN                  | H.s. <b>TRSAIRRA</b> STIEM<br>M.m. <b>TRSAIRRA</b> STIEM<br>B.t. <b>TRSAIRRA</b> STIEM                                           |          | COPI binding site<br>PKA phosphorylation of Ser-16<br>Cell surface expression upon mutation of Arg-based signal                    | Sharma P et al., PLoS One., 2010 Jul 9;5(7):e11486.                                                                                                                                                                                                                                             |
| Kir6.1               | H.s. <b>HQNSLRKRN</b> HRRN<br>M.m. <b>HQNSLRKRN</b> HRRN<br>B.t. <b>HQNSLRKRN</b> HRRN                                           |          | Cell surface expression upon mutation of Arg-based signal                                                                          | Zerangue N et al., Neuron. 1999 Mar;22(3):537-48.                                                                                                                                                                                                                                               |
| Kir6.2               | H.s. <b>ARGPLRKR</b> VPMA<br>M.m. <b>SRGFLRKR</b> VAVA<br>G.g. <b>PRGTFRKR</b> VALK                                              |          | 14-3-3 binding site<br>COPI binding site<br>Cell surface expression upon mutation of Arg-based signal                              | Zerangue N et al., Neuron. 1999 Mar;22(3):537-48<br>Yuan H et al., Curr Biol. 2003 Apr 15;13(8):638-46<br>Heusser K et al., J Cell Sci. 2006 Oct 15;119(Pt 20):4353-63                                                                                                                          |
| ENaC (α)             | H.s. <b>LLRRFR</b> RYWSP<br>M.m. <b>LLRRFR</b> RYWSP<br>B.t. <b>LLRRFR</b> RYWSP                                                 |          | Arg-based signal characterised as an ER-exit signal                                                                                | Muelker GM et al., J Biol Chem. 2007 Nov 16;282(46):33475-83                                                                                                                                                                                                                                    |
| KA-2                 | H.s. <b>RRTSR</b> RRRRRPQGPS<br>M.m. <b>RRTSR</b> RRRRRPQGPS<br>B.t. <b>RRTSR</b> RRRRRPQGPS                                     |          | Partial cell surface expression upon mutation of Arg-based signal.<br>Second Arg-based motif in adjacent intracellular loop (580). | Nasu-Nishimura Y et al., J Neurosci. 2006 Jun 28;26(26):7014-21.<br>Ren Z et al., J Neurosci. 2003 Jul 23;23(16):6698-19                                                                                                                                                                        |
| NMDA-R1              | H.s. <b>LASSFKRR</b> SKDT<br>M.m. <b>LASSFKRR</b> SKDT<br>G.g. <b>LASSFKRR</b> SKDT                                              |          | COPI binding site<br>PKC, PKA phosphorylation of Ser-696, Ser-697<br>Cell surface expression upon mutation of Arg-based signal     | Scott DB et al., J Neurosci. 2001 May 1;21(9):3063-72<br>Scott DB et al., Neuropharmacology. 2003 Nov;45(6):755-67                                                                                                                                                                              |
| TASK1                | H.s. <b>GLMKRR</b> SV<br>M.m. <b>GLMKRR</b> SV<br>B.t. <b>GLMKRR</b> SV                                                          |          | 14-3-3 binding site<br>COPI binding site<br>PKA phosphorylation of Ser-392, 393                                                    | Rajan S et al., J Physiol. 2002 Nov 15;545(Pt 1):13-26<br>Zuzarte M et al., J Physiol. 2009 Mar 1;587(Pt 5):929-52<br>Mant A et al., J Biol Chem. 2011 Apr 22;286(16):14110-9                                                                                                                   |
| TASK3                | H.s. <b>RLMKRR</b> SV<br>M.m. <b>RLMKRR</b> SI<br>B.t. <b>RLMKRR</b> SI                                                          |          | 14-3-3 binding site<br>COPI binding site<br>PKA phosphorylation of Ser-373                                                         | Rajan S et al., J Physiol. 2002 Nov 15;545(Pt 1):13-26<br>Zuzarte M et al., J Physiol. 2009 Mar 1;587(Pt 5):929-52<br>Mant A et al., J Biol Chem. 2011 Apr 22;286(16):14110-9                                                                                                                   |
| SOAT1                | H.s. <b>EKMSLRNL</b> KSRRE<br>M.m. <b>-KSLRNL</b> KSRGE<br>B.t. <b>KRVYFKRR</b> SRSSN                                            |          | COPI binding site<br>Cell surface expression upon mutation of Arg-based signal                                                     | Sharma P et al., PLoS One., 2010 Jul 9;5(7):e11486.                                                                                                                                                                                                                                             |
| GABA <sub>A</sub> R1 | H.s. <b>SRQQLSR</b> RHPFT<br>M.m. <b>SRQQLSR</b> RHPFT<br>B.t. <b>SRQQLSR</b> RHPFT                                              |          | 14-3-3 binding site<br>COPI binding site<br>Cell surface expression upon mutation of Arg-based signal                              | Pagano A et al., J Neurosci. 2001 Feb 15;21(4):1189-202<br>Couve A et al., Mol Cell Neurosci. 2001 Feb;17(2):317-28<br>Brook C et al., Mol Biol Cell. 2005 Dec;16(12):5572-9<br>Margeta-Mitrovic M et al., Neuron. 2000 Jul;27(1):97-106<br>Laffray S et al., EMBO J. 2012 Aug 1;31(15):3239-51 |
| OPRK1                | H.s. <b>RMRGOST</b> RVNTV<br>M.m. <b>RMRGOST</b> RVNTV<br>B.t. <b>RMRGOST</b> RVNTV                                              |          | 14-3-3 binding site<br>COPI binding site                                                                                           | Li JG et al., J Biol Chem. 2012 Sep 18                                                                                                                                                                                                                                                          |
| GPR15                | H.s. <b>EDFARRRK</b> SVSL<br>M.m. <b>EDFARRRK</b> SVSL<br>B.t. <b>EDFARRRK</b> SVSL                                              |          | 14-3-3 binding site<br>COPI binding site<br>Cell surface expression upon mutation of Arg-based signal                              | Okamoto Y et al., J Biol Chem. 2011 Mar 4;286(9):7171-81                                                                                                                                                                                                                                        |
| MDR1                 | H.s. <b>SRSSLLR</b> KSTPRS<br>M.m. <b>SRSSLLR</b> KSTPRS<br>B.t. <b>SRSSLLR</b> KSTPRS                                           |          | Arg-based signal characterised as an ER-exit signal                                                                                | Prokopenko O et al., Am J Physiol Cell Physiol. 2009 May;296(5):C1086-97                                                                                                                                                                                                                        |
| CFTR1                | H.s. <b>PTFLQRRK</b> VNLN<br>M.m. <b>PTFLQRRK</b> VLDL<br>B.t. <b>PTFLQRRK</b> VNLN                                              |          | Putative 14-3-3 binding site<br>Putative COPI binding site                                                                         | Liang X et al., Mol Biol Cell. 2012 Mar;23(6):996-1009                                                                                                                                                                                                                                          |
| Nav1.8               | H.s. <b>GLASGRRA</b> HGVSF<br>M.m. <b>GLSGRRRA</b> HSSVF<br>B.t. <b>GLATGRRA</b> HGVSF                                           |          | Cell surface expression upon mutation of Arg-based signal                                                                          | Zhang ZN et al., J Cell Sci. 2008 Oct 1;121(Pt 19):3243-52                                                                                                                                                                                                                                      |



## SUPPLEMENTARY FIGURE LEGENDS

**Fig. S1.** Kir6.2 steady-state levels support co-assembly of Kir6.2 and SUR1 in both atria and ventricles. (A) Relative solubilization efficiency of SUR1 and Kir6.2. SDS PAGE analysis of solubilized mouse whole heart membrane fractions ('S' indicates supernatant and 'P' insoluble pellet) using solubilization buffers 'BUF 1-3' (BUF 1: 1.5% Triton-X100, 0.75% Na,deoxycholate, 0.1% SDS in 10 mM NaCl, 5 mM EDTA, 2.5 mM EGTA and 50 mM Tris/HCl pH 7.35; BUF 2: 1.5% Triton-X100 in 10 mM NaCl, 50 mM Tris/HCl pH 7.35; BUF 3: 2.5% w/v Digitonin, 500 mM 6-aminohexanoic acid, 1 mM EDTA, 50 mM imidazole/HCl pH 7.0). Bar graph depicts relative solubilization of SUR1 and Kir6.2 in comparison to the  $\alpha 1$  subunit of the Na,K-ATPase 'Na,K' based on densitometric analysis of the blot shown to the right. Signals were normalized to the signal observed in the supernatant after solubilization using BUF1. (B) Quantification of three experiments as shown in Figure 1B illustrating averaged levels of SUR2A (filled bars) and Kir6.2 (open bars) in atria 'A' and ventricles 'V'. Error bars indicate S.E.M. and asterisks significantly lower levels of SUR2A in atria than in ventricles ( $p < 0.005$ ). (C) Western blot for the  $K_{ATP}$  channel subunits SUR1 and Kir6.2 and  $\alpha 1$  subunit of the Na,K-ATPase using mouse cardiac membranes of the indicated genotypes. Filled arrowhead marks the core- and asterisks the complex-glycosylated forms of SUR1. Membranes from mouse atrial 'A' and ventricular tissue 'V' were prepared separately. Blot represents one of three individual experiments. (D) Relative levels of total Kir6.2 protein in atrial and ventricular tissue. Bar graphs summarize three independent experiments performed on membranes pooled from three animals and error bars indicate S.E.M. (E) Western blot for the  $K_{ATP}$  channel subunits SUR1 and Kir6.2 and  $\alpha 1$  subunit of the Na,K-ATPase using mouse brain membranes of the indicated genotypes. Filled arrowhead marks the core- and asterisk the complex-glycosylated forms of SUR1. The blot is representative of three independent experiments. Membranes from total brain were analyzed because the notion that Kir6.2 and SUR1 co-assemble in neuronal  $K_{ATP}$  channels is well established. Hence the analysis confirms reduction of Kir6.2 steady-state levels in the absence of its partner subunit suggesting that Kir6.2 is indeed the partner of SUR1 in cardiac tissue.

**Fig. S2.** Subcellular localization of SUR1 and Kir6.2 in the absence of the respective partner subunit and antibody controls. Confocal analysis of isolated, immunostained mouse atrial ‘AM’ or ventricular ‘VM’ myocytes of the indicated genotype. Anti-SUR1 (A), anti-Kir6.2 (B) and anti-SUR2A (C) immunofluorescence signals are shown. Images obtained from cardiomyocytes not expressing the target protein (*abcc8*<sup>-/-</sup> in (A) and *kcnj11*<sup>-/-</sup> in (B); labeled ‘neg. ctrl.’) demonstrate the specificity of the antibodies used in the relevant cell type by direct comparison using the same immuno-staining conditions. Weak juxtannuclear signals of SUR1/2A or Kir6.2 in cardiac myocytes genotypes lacking the respective partner subunit (knock-out genotypes as indicated) are documented by insets, which show the nucleus (‘n’ in the large image) and surrounding area as contrast-enhanced, inverted images for the boxed regions of interest. Apart from the juxtannuclear staining, the labeling of the nucleus for Kir6.2 in (B) is considered as unspecific, since it can also be found in the *kcnj11*<sup>-/-</sup> cells. (D) Projection image of isolated, immunostained wt mouse atrial ‘AM’ or ventricular ‘VM’ myocytes stained with an anti-p115 antibody, which labels the cis-Golgi. Nuclei were labeled using DAPI. The corresponding brightfield image of the myocyte is shown above. Projections consist of 16 slices for ‘AM’ and 15 slices for ‘VM’ at a slice interval of 0.69  $\mu\text{m}$ . Scale bars 10  $\mu\text{m}$ .

**Fig. S3.**  $\beta$ -adrenergic stimulation does not affect localization of sodium-calcium exchanger NCX1 to T-tubule membrane invaginations at striations of ventricular myocytes. (A) Confocal analysis of mouse ventricular myocytes immunostained for NCX1 in the absence or presence of stimulation (10  $\mu\text{M}$  ISO and 10  $\mu\text{M}$  ROL). Dashed boxes indicate the magnified (2x) intracellular region of interest showing the direct (middle) and binary inverse contrasted signal (bottom). Scale bar 10  $\mu\text{m}$ . (B) Power spectrum (Fourier analysis) of 17 untreated and 17 treated myocytes; the 1<sup>st</sup> peak indicates the degree of periodicity of the striated signal (arrowhead). (C) Bar graph summarizing the average change in power at the 1<sup>st</sup> peak marked in (B); error bars show standard error of the mean (S.E.M). There is no significant difference between treated and untreated cells. (D) Ventricular myocyte co-stained for NCX1 (red) and SUR1 (green). Intensity profiles of depicted sections demonstrate colocalization of SUR1 and NCX1 at T-tubular striations. Scale bar is 10  $\mu\text{m}$ . (E) Quantification of three experiments as shown in Figure 4F illustrating averaged levels

of 14-3-3 proteins (pan-reactive antibody), protein kinase A 'PKA', Kir6.2, SUR1 and the serine 16-phosphoform of phospholamban 'PLN<sub>(ps)</sub>' in control (open bars) and ISO/ROL-treated (filled bars) ventricular myocytes. Cytosolic proteins were normalized to GAPDH, membrane proteins to the  $\alpha$ 1 subunit of the Na,K-ATPase. Error bars indicate S.E.M. and asterisk significantly increased levels of phosphorylated phospholamban ( $p < 0.05$ ).

**Fig. S4.** Kir6.2 is phosphorylated upon sustained beta-adrenergic stimulation in vivo. (A) A schematic representation of the experimental setup used to probe the phosphorylation status of a given protein of interest using an Immobilised Metal Affinity Chromatography (IMAC) matrix (Phostag<sup>TM</sup> agarose). Competitive binding assays that confirm the specificity of the affinity of PKA phosphorylated substrates to the Phos-tag agarose matrix were performed by preincubating the solubilized extracts with either a control antibody (Rabbit IgG) that detects no known antigen or an antibody (PKA pSub Ab) that detects PKA-phosphorylated substrates. Both the bound (eluate) and unbound (flow-through) fractions were analyzed by Western blot detection. The site of PKA phosphorylation (S372) in Kir6.2, most likely recognized by the PKA pSub antibody, has been highlighted. (B) Membranes prepared from wildtype mouse hearts were in vitro phosphorylated using recombinantly purified PKA in the presence of an ATP regeneration system (ATPr) or treated with calf intestinal alkaline phosphatase (AP) in the presence of a PKA inhibitory peptide (PKI). Phosphorylated proteins were enriched using Phos-tag agarose. Antibody competition assays were performed as depicted in (A). The unbound fraction, depleted of phosphorylated proteins, was analyzed by Western blot detection for Kir6.2 and a phosphorylated form of phospholamban (phosphoserine 16). (C) Membranes prepared from wildtype mouse hearts perfused in the presence (+) or absence (-) of 10  $\mu$ M isoproterenol and 10  $\mu$ M rolipram were analyzed as depicted in (A). The unbound fraction (depleted of phosphorylated proteins) and the bound fraction (enriched in phosphorylated proteins) were analyzed by Western blot detection as indicated. Filled arrowheads indicate either the IgG or PKA pSub antibody supplementing the solubilized extracts for competitive binding assays. (D) The recombinant catalytic subunit of PKA phosphorylates the C-terminus of Kir6.2 as indicated by altered migration in Phos-tag gel electrophoresis after Coomassie

staining. 'ATPr' indicates the use of an ATP regeneration system. (E) Cardiac cytosol and total membranes contain PKA that phosphorylates the C-terminus of Kir6.2. Analysis as in (B), 'PKI' indicates protein kinase A inhibitor peptide. (D)

**Fig. S5.** Quantification of COPI binding to the Kir6.2 C-terminal peptide before and after phosphorylation by PKA. (A) Silver stain of purified recombinant COPI coat and Western blot detection of individual subunits by the indicated antibodies. (B) Schematic depiction of the COPI heptamer with trunk (CM4) and cage (CM3) subcomplexes indicated. Mapped binding sites for C-terminal di-lysine (-KKXX), Arg-based (-RXR) and Arf1 are labeled. (C) Representative blots demonstrating efficient phosphorylation of the Kir6.2 C-terminal peptide and levels of individual COPI subunits in the eluates. (D) Quantification of the fluorescence intensity obtained from Western blot signals reflecting binding of individual COPI subunits to the indicated peptides in three independent experiments. Error bars indicate S.E.M. Asterisk denotes  $p < 0.05$ , non-significant value of  $p < 0.06$  is indicated for  $\beta'$ -COP.

**Table S1.** Antibodies used in this study.

**Table S2.** Synopsis of the characterization of Arg-based signals in membrane proteins. Effects of mutating the Arg-based signal, COPI and 14-3-3 binding or phosphorylation on the indicated cargo protein are summarized. Red line indicates a confirmed COPI binding site and green line a confirmed 14-3-3 binding site.
